# Supplementary material for: Rapid Restoration of Cell Phenotype and Matrix Forming Capacity Following Transient Nuclear Softening
Source: bioRxiv or medRxiv preprint supplement (doi:10.1101/2022.12.05.519160), 2022-12-08
Supplement: Supplementary file [file media-1.pdf]

## Title

Rapid Restoration of Cell Phenotype and Matrix Forming Capacity Following Transient Nuclear Softening

## Author names

Ryan C. Locke<sup>1,2,3</sup> & Liane Miller<sup>1</sup>, Elisabeth A. Lemmon<sup>1,2,4</sup>, Screen S. Assi<sup>1</sup>, Dakota L. Jones<sup>2</sup>, Eddie D. Bonnevie<sup>1,2,3</sup>, Jason A. Burdick<sup>2,5</sup>, Su Jin Heo<sup>1,2</sup>, and Robert L. Mauck<sup>1,2,3</sup>

## Affiliations

<sup>1</sup>Department of Orthopaedic Surgery, University of Pennsylvania, Philadelphia, PA, USA

<sup>2</sup>Department of Bioengineering, University of Pennsylvania, Philadelphia, PA, USA

<sup>3</sup>Department of Veterans Affairs, CMC VAMC, Philadelphia, PA, USA

<sup>4</sup>School of Veterinary Medicine, University of Pennsylvania, Philadelphia, PA, USA

<sup>5</sup>BioFrontiers Institute and Department of Chemical and Biological Engineering, University of Colorado, Boulder, CO, USA

## Supplemental data

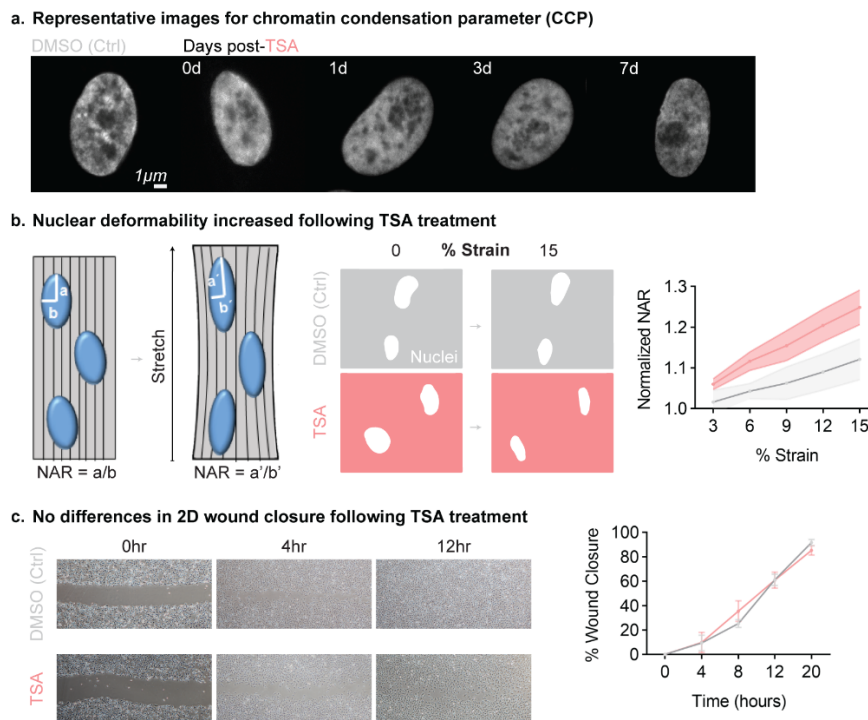

**Supplemental Figure 1.** (a) Representative images of high magnification DAPI-stained nuclei used for quantification of chromatin condensation parameter edge density. (b) Schematic of nuclear deformability assay and representative binarized images of DAPI-stained nuclei at 0 and 15% strain for DMSO-treated controls and TSA-treated cells. Quantification of the nuclear aspect ratio (NAR) at incremental strain steps for DMSO-treated controls and TSA-treated cells, showing increased nuclear deformability at each strain step following TSA treatment. (c) Representative images of 2-dimensional scratch assay over time for DMSO-treated controls and TSA-treated cells, and quantification of percent wound closure over time. N=5-6.

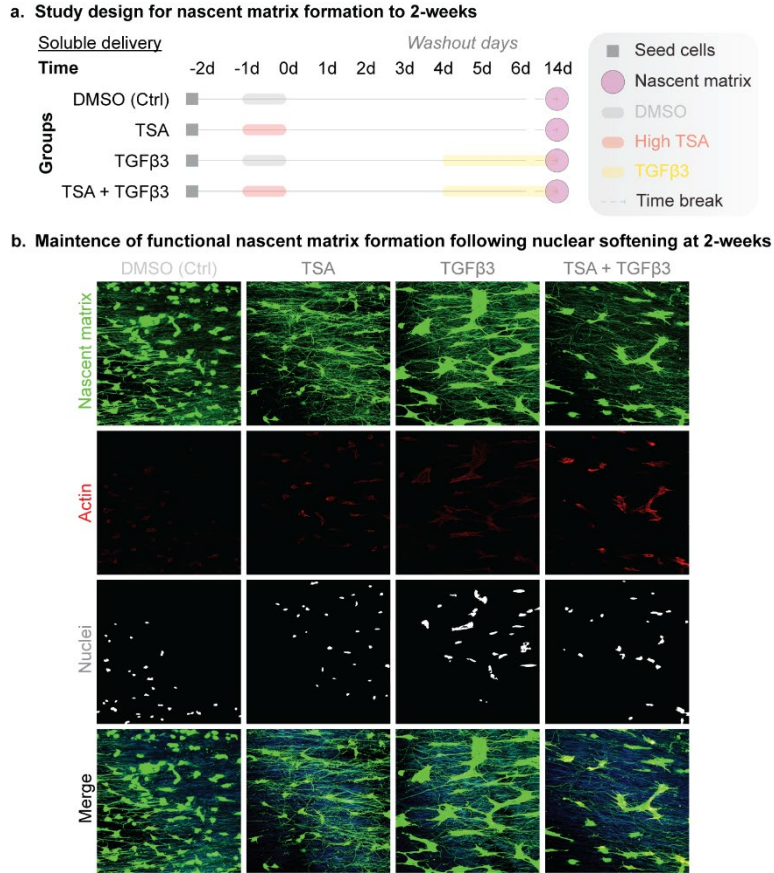

**Supplemental Figure 2.** Representative confocal images of nascent matrix at 14 days following DMSO, TSA, TGF $\beta$ 3, or TSA + TGF $\beta$ 3 treatment. Green: deposited nascent matrix over the culture period, yellow: overlay of nascent matrix and actin (red), blue: nanofibrous scaffold autofluorescence, magenta: nuclei.

**a. Complete recovery of bulk transcriptional phenotype and normal response to pro-matrix stimuli following washout of low-dose TSA**

Low (150nM) TSA dose

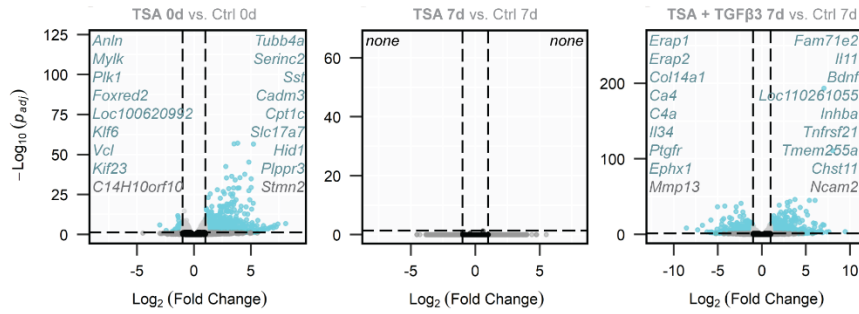

**b. Significant overlap and differences in differentially expressed genes between low- and high-dose TSA treatments at day 0**

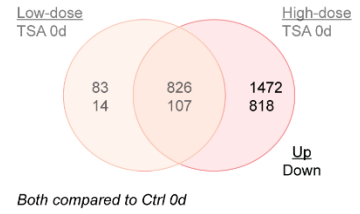

**c. Minimal differences in differential expression between low- and high-dose TSA treatment at day 7**

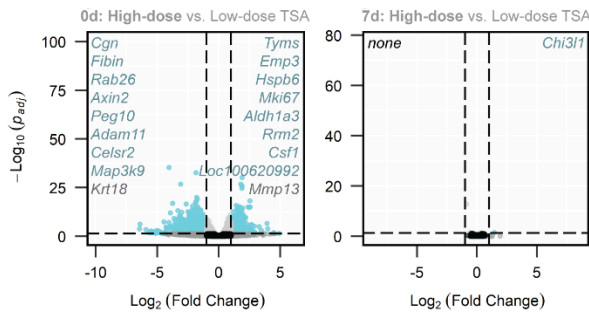

**d. Minimal differences in response to subsequent TGFβ3 following prior exposure to low- or high-dose TSA compared to TGFβ3-control**

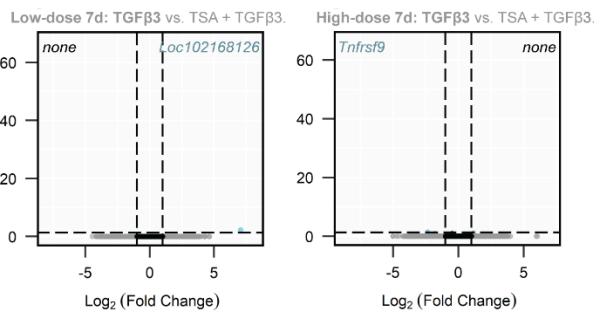

**Supplemental Figure 3.** (a) Volcano plots for low-dose TSA treatment groups. (b) Venn diagram comparing differentially expressed genes at day 0 following low- and high-dose TSA. Numbers indicate upregulated (top number) genes and downregulated (bottom number) genes. Non-overlapping quadrants represent unique gene sets for each group. (c) Volcano plots for high-dose compared to low-dose TSA treatment at day 0 and 7. (d) Volcano plots for TGFβ3 only compared to low- or high-dose TSA + TGFβ3 at day 7.

**a. High similarity of differentially expressed genes for TGF-treated groups**

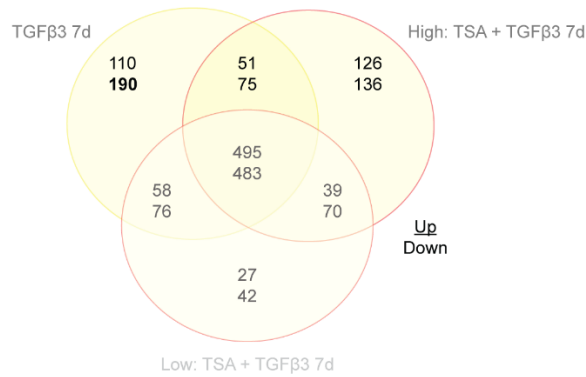

**b. Minimal pathway differences between unique genes for TGF-treated groups**

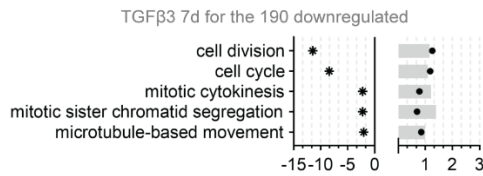

**Supplemental Figure 4.** (a) Venn diagram of differentially expressed genes between groups treated with TGFβ3, including TGFβ3 only, high-dose TSA + TGFβ3, and low-dose TSA + TGFβ3. Numbers indicate upregulated (top number) genes and downregulated (bottom number) genes. Non-overlapping quadrants represent unique gene sets for each group. (b) Gene ontologies for unique upregulated genes following high-dose TSA + TGFβ3. Note: The unique downregulated genes following high-dose TSA + TGFβ3 and both the up- and down-regulated genes following low-dose TSA + TGFβ3 were not significantly enriched into specific gene ontologies.
